# Supplementary material for: A surface-engineered contact lens for tear fluid biomolecule sensing
Source: Royal Society of Chemistry journal article supplement (doi:10.1039/d4lc00176a), 2024-01-01
Supplement: d4lc00176a1.pdf [file d4lc00176a1.pdf]

## Electronic Supplementary Information

### Surface engineered contact lens for tear fluid biomolecule sensing

Aravind M, <sup>a</sup> Sajan D. George <sup>a,b\*</sup>

<sup>a</sup>Department of Atomic and Molecular Physics, Manipal Academy of Higher Education, Manipal, India –  
576104.

<sup>b</sup>Centre for Applied Nanosciences (CAN), Manipal Academy of Higher Education, Manipal, India –  
576104.

**Table S1.** Concentrations of various tear constituents. (*The upper limit of the concentration range was used for selectivity study.*)

| <b>Tear Constituent</b> | <b>Concentration <sup>1</sup></b>                                                       |
|-------------------------|-----------------------------------------------------------------------------------------|
| Lactoferrin             | 0.63 – 2.9 mg/ml                                                                        |
| Lysozyme                | 2.5 – 3.4 mg/ml                                                                         |
| Albumin                 | 6.0 – 15.2 mg/ml ( <i>normal</i> )<br>67 – 150 mg/ml ( <i>ocular diseases</i> )         |
| Glucose                 | 1.0 – 6.2 mg per 100 ml ( <i>normal</i> )<br>7.2 – 26 mg per 100 ml ( <i>diabetes</i> ) |
| Na <sup>+</sup>         | 80 – 170 mM                                                                             |
| K <sup>+</sup>          | 6 – 42 mM                                                                               |
| Ca <sup>2+</sup>        | 0.3 – 2.0 mM                                                                            |

<sup>1</sup> Yamada, K.; Takaki, S.; Komuro, N.; Suzuki, K.; Citterio, D., *Analyst* 2014, 139 (7), 1637-1643. DOI 10.1039/C3AN01926H.

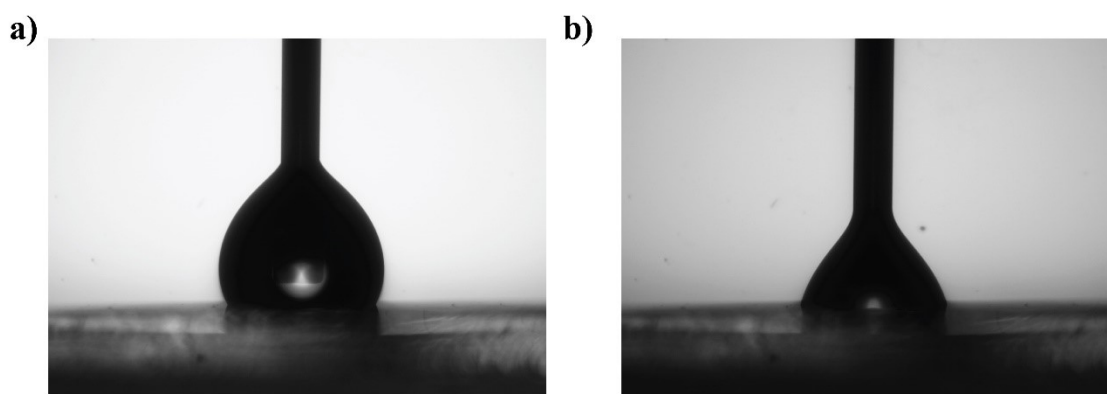

**Fig. S1.** a) Advancing and b) receding contact angle of pristine PDMS surface.

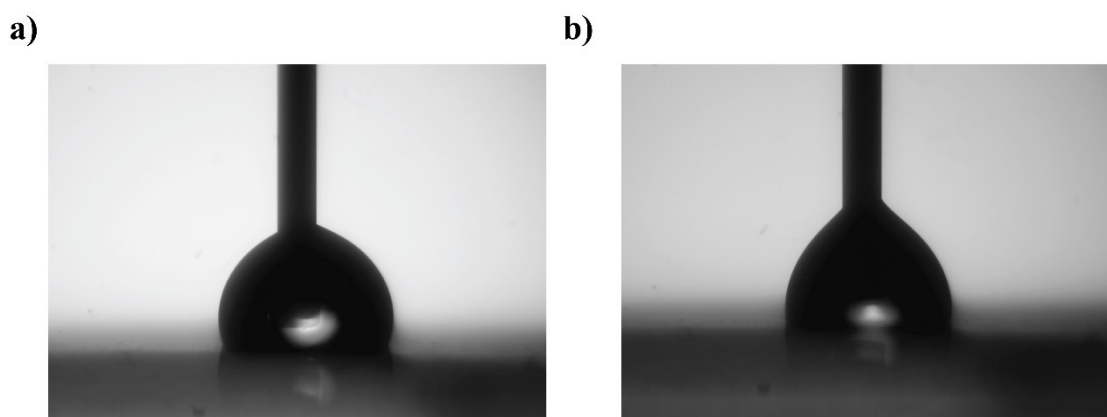

**Fig. S2.** a) Advancing and b) receding contact angle of oil grafted PDMS surface.

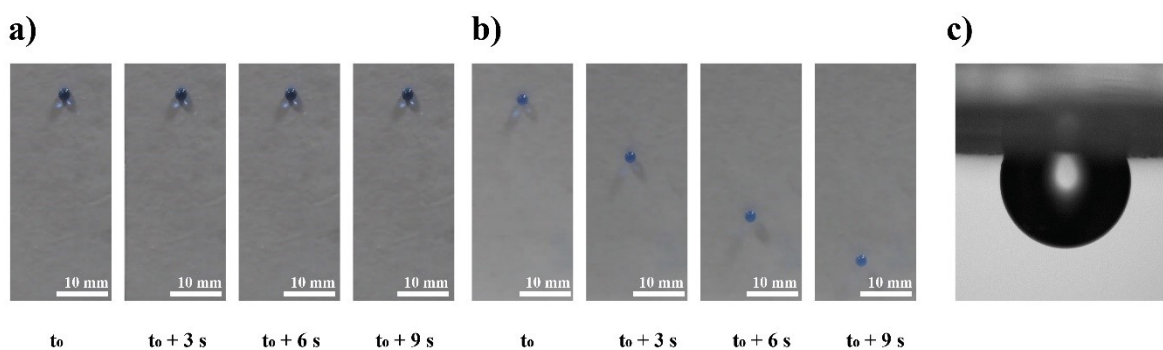

**Fig. S3.** A 10  $\mu$ l water droplet on a vertically kept a) Pristine PDMS, b) uniformly oil-grafted PDMS surface, and c) A 10  $\mu$ l water droplet in pristine PDMS tilted upside down.

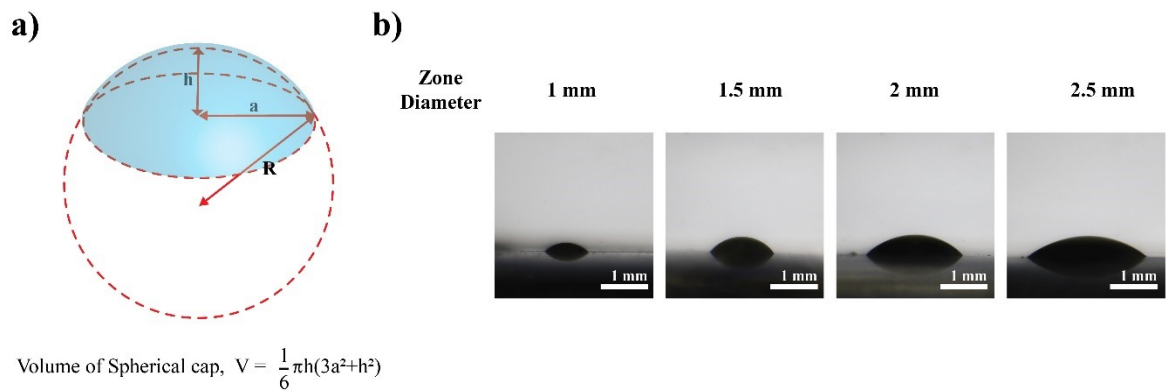

**Fig. S4.** a) Schematic of spherical cap and b) Droplet after splitting on zones of various dimensions.

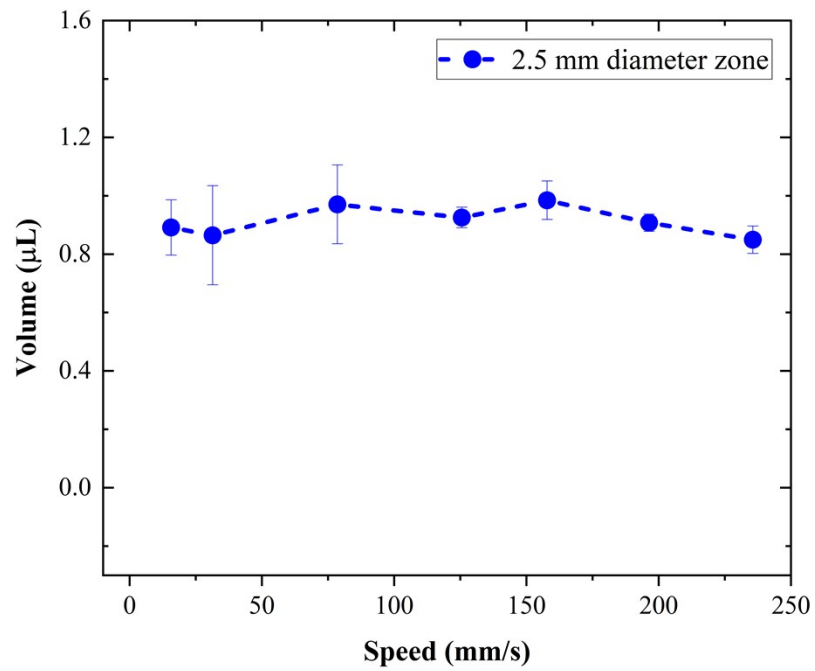

**Fig. S5.** The volume split on an adhesive contrast contact lens at various speed.

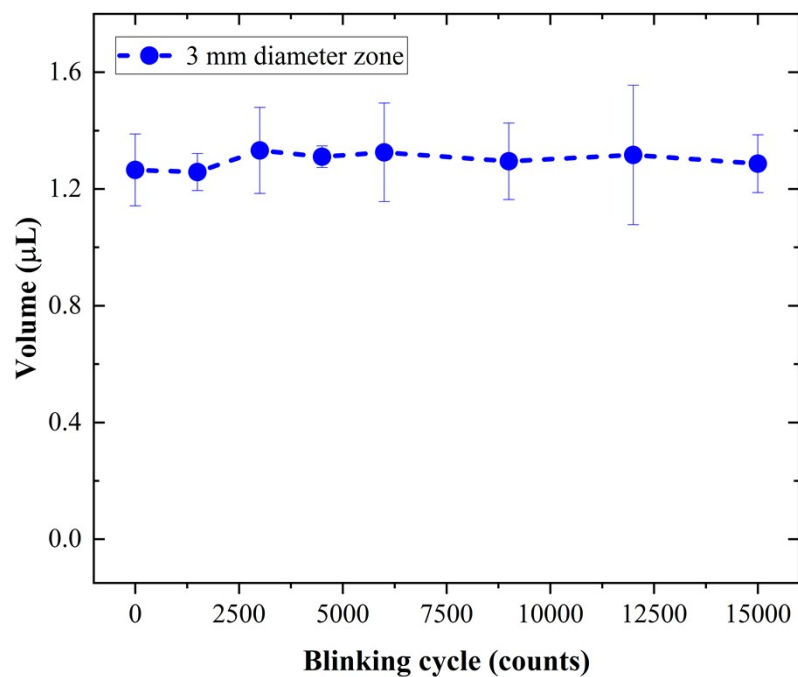

**Fig. S6.** The stability test, the adhesive contrast surface was ascended and descended into a water bath at speed nearly 80 mm/s.

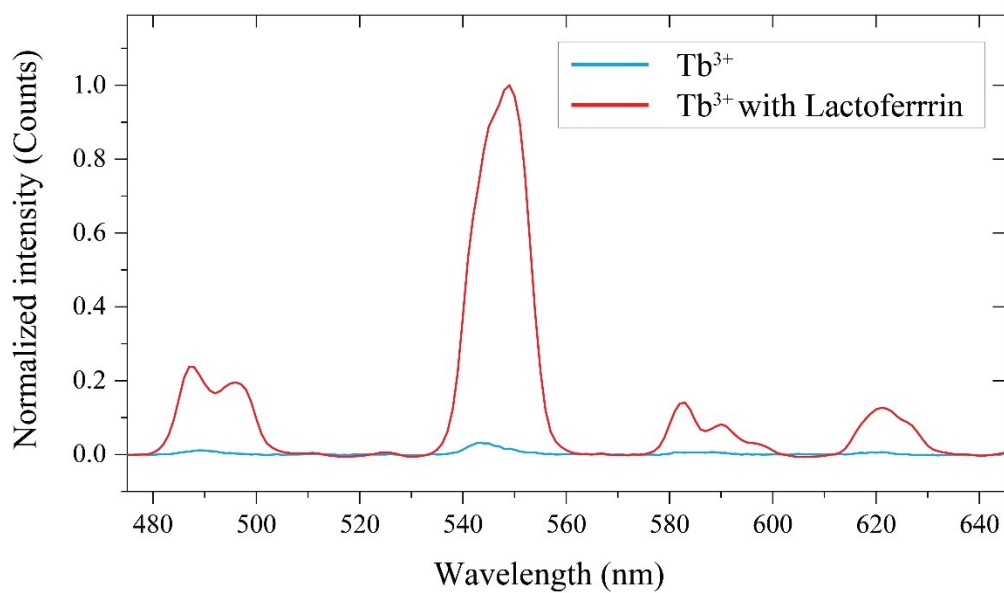

**Fig. S7.** Fluorescence emission spectra of 1 mM  $TbCl_3$  solutions (50 mM TRIS, pH 7.4) in the absence and presence of human lactoferrin with UV excitation.

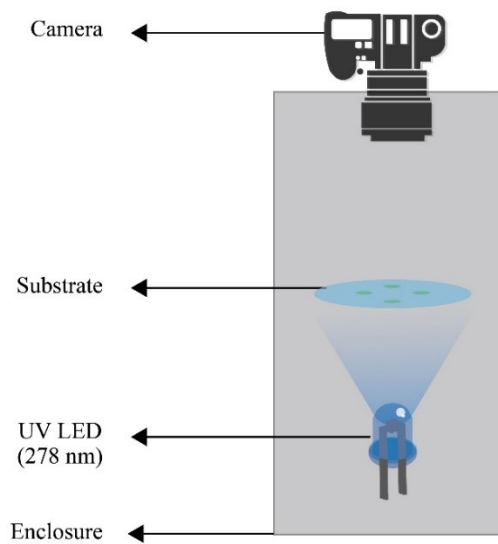

**Fig. S8.** Schematic of experimental setup for the colorimetric detection of lactoferrin on the adhesive contrast surface.

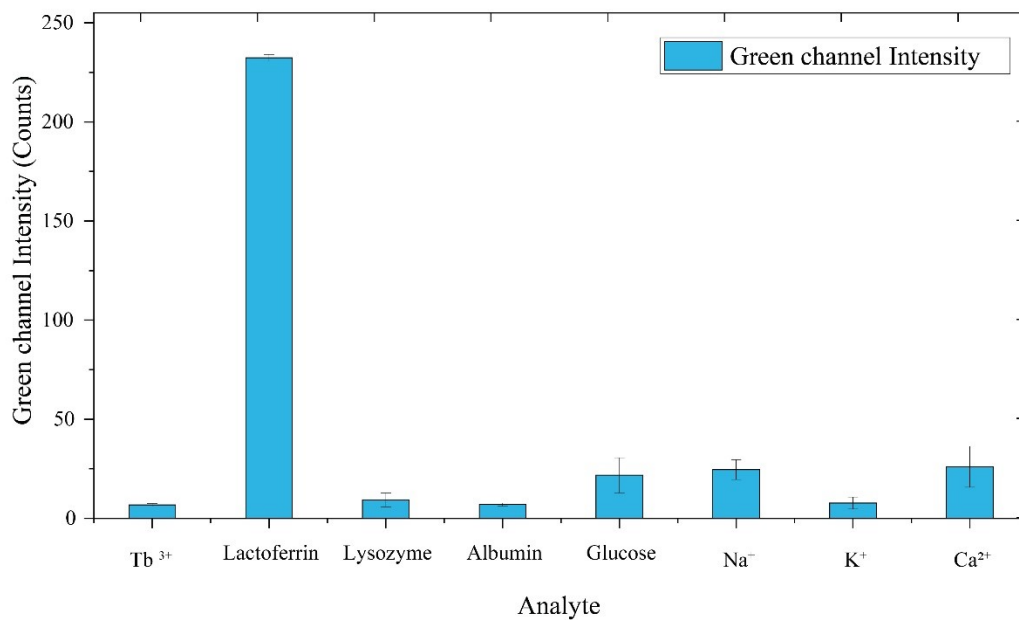

**Fig. S9.** Selectivity study showing the response of various tear constituents, concentrations as shown in Table S1.
